# Supplementary material for: On the role of non-covalent interactions in the assembly of 3D zirconium methyl- and ethyl-N,N-bis phosphonates
Source: Royal Society of Chemistry journal article supplement (doi:10.1039/c3dt50400j), 2013-01-01
Supplement: c3dt50400j.pdf [file c3dt50400j.pdf]

## Supplementary information for the paper

# “On the Role of Non-Covalent Interactions in the Assembly of 3D Zirconium Methyl- and Ethyl-N,N-bis phosphonates.”

Marco Taddei, Ferdinando Costantino, Riccardo Vivani

Table S1. Fractional coordinates and isotropic atomic displacement factors for **1**.

| Atom  | <i>x/a</i> | <i>y/b</i> | <i>z/c</i> | <i>U</i> <sub>iso</sub> ×100 |
|-------|------------|------------|------------|------------------------------|
| Zr(1) | 1.0        | 1.0        | 0.0        | 1.7(1)                       |
| Zr(2) | 0.5        | 1.0        | 0.5        | 2.1(1)                       |
| P(1)  | 0.5443(11) | 0.8796(6)  | 0.1867(5)  | 2.3(2)                       |
| P(2)  | 1.1533(10) | 0.7296(7)  | 0.5353(5)  | 2.2(2)                       |
| F(3)  | 0.9954(16) | 0.7859(10) | -0.0491(7) | 2.4(1)                       |
| O(1)  | 0.3055(18) | 0.8710(12) | 0.1217(9)  | 2.4(1)                       |
| O(2)  | 1.2529(18) | 0.6115(11) | 0.4385(9)  | 2.4(1)                       |
| O(3)  | 0.7036(19) | 0.9727(14) | 0.1179(8)  | 2.4(1)                       |
| O(4)  | 1.3514(18) | 0.8210(12) | 0.5657(8)  | 2.4(1)                       |
| O(5)  | 0.8859(17) | 0.8625(12) | 0.5049(9)  | 2.4(1)                       |
| O(6)  | 0.4429(20) | 0.9321(13) | 0.3218(8)  | 2.4(1)                       |
| N(1)  | 1.3096(22) | 0.4654(14) | 0.7261(12) | 2.4(1)                       |
| C(1)  | 1.4738(27) | 0.5297(20) | 0.8010(14) | 2.4(1)                       |
| C(2)  | 1.0721(27) | 0.6050(16) | 0.6720(11) | 2.4(1)                       |
| C(3)  | 0.7790(25) | 0.6696(11) | 0.2183(13) | 2.4(1)                       |

Table S2. Selected bond lengths and angles for **1**.

| Bond       | Length/Å | Bond        | Length/Å |
|------------|----------|-------------|----------|
| Zr(1)-F(3) | 1.956(8) | P(2)-O(2)   | 1.494(7) |
| Zr(1)-O(1) | 2.09(1)  | P(2)-O(4)   | 1.534(8) |
| Zr(1)-O(3) | 2.038(8) | P(2)-O(5)   | 1.543(8) |
| Zr(2)-O(5) | 2.016(9) | P(2)-C(2)   | 1.861(8) |
| Zr(2)-O(6) | 2.121(9) | C(1)-N(1)   | 1.45(1)  |
| Zr(2)-O(4) | 1.984(9) | C(2)-N(1)   | 1.54(1)  |
| P(1)-O(1)  | 1.481(8) | C(3)-N(1)   | 1.45(1)  |
| P(1)-O(3)  | 1.463(7) | H-bonds     |          |
| P(1)-O(6)  | 1.600(8) | N(1)···O(2) | 2.82(2)  |
| P(1)-C(3)  | 1.858(8) |             |          |

  

| Angle           | Amplitude/° | Angle          | Amplitude/° |
|-----------------|-------------|----------------|-------------|
| F(3)-Zr(1)-O(1) | 87.0(3)     | O(1)-P(1)-O(3) | 115.5(7)    |
| F(3)-Zr(1)-O(1) | 93.0(3)     | O(1)-P(1)-O(6) | 105.6(6)    |
| F(3)-Zr(1)-O(3) | 83.4(4)     | O(1)-P(1)-C(3) | 110.0(7)    |
| F(3)-Zr(1)-O(3) | 96.6(4)     | O(2)-P(2)-O(4) | 113.5(6)    |
| O(1)-Zr(1)-O(3) | 94.1(3)     | O(2)-P(2)-O(5) | 114.9(6)    |
| O(1)-Zr(1)-O(3) | 85.9(3)     | O(2)-P(2)-C(2) | 105.4(7)    |
| O(4)-Zr(2)-O(5) | 96.3(4)     | C(1)-N(1)-C(2) | 110.6(9)    |
| O(4)-Zr(2)-O(5) | 83.7(4)     | C(1)-N(1)-C(3) | 117(1)      |
| O(4)-Zr(2)-O(6) | 86.1(3)     | C(2)-N(1)-C(3) | 110.5(9)    |
| O(4)-Zr(2)-O(6) | 93.9(3)     |                |             |

Table S3. Fractional coordinates and isotropic atomic displacement parameters for **2**.

| Atom  | <i>x/a</i> | <i>y/b</i> | <i>z/c</i> | <i>U</i> <sub>iso</sub> ×100 |
|-------|------------|------------|------------|------------------------------|
| Zr(1) | 0.666700   | 0.333300   | 0.13854(7) | 0.92(5)                      |
| Zr(2) | 1.0        | 0.0        | 0.0        | 1.63(8)                      |
| C(1)  | 0.4588(10) | -0.1068(8) | 0.1012(4)  | 2.65(9)                      |
| C(2)  | 0.5490(8)  | 0.0024(9)  | 0.0860(5)  | 2.65(9)                      |
| N(1)  | 0.6509(7)  | -0.0033(8) | 0.0700(5)  | 2.65(9)                      |
| C(3)  | 0.7104(9)  | -0.0146(9) | 0.1111(5)  | 2.65(9)                      |
| C(4)  | 0.7276(8)  | 0.0897(8)  | 0.0340(5)  | 2.65(9)                      |
| P(1)  | 0.7943(3)  | -0.0835(3) | 0.0957(2)  | 2.3(1)                       |
| P(2)  | 0.8112(3)  | 0.2346(3)  | 0.0595(2)  | 2.6(1)                       |
| O(1)  | 0.8639(5)  | -0.0584(7) | 0.1441(3)  | 2.65(9)                      |
| O(2)  | 0.7172(6)  | -0.2015(6) | 0.0825(4)  | 2.65(9)                      |
| O(3)  | 0.8671(5)  | -0.0285(5) | 0.0473(2)  | 2.65(9)                      |
| O(4)  | 0.8973(6)  | 0.2396(5)  | 0.1035(3)  | 2.65(9)                      |
| O(5)  | 0.8630(6)  | 0.3055(6)  | 0.0114(3)  | 2.65(9)                      |
| O(6)  | 0.7364(7)  | 0.2634(7)  | 0.0922(3)  | 2.65(9)                      |

Table S4. Selected bond lengths and angles for **2**.

| Bond       | Length/Å | Bond      | Length/Å  |
|------------|----------|-----------|-----------|
| Zr(1)-O(1) | 2.088(6) | P(2)-O(5) | 1.498(7)  |
| Zr(1)-O(6) | 2.055(6) | P(2)-O(6) | 1.535(6)  |
| Zr(2)-O(3) | 2.072(5) | C(1)-C(2) | 1.467(1)  |
| P(1)-C(3)  | 1.898(9) | C(2)-N(1) | 1.524(11) |
| P(1)-O(1)  | 1.485(6) | N(1)-C(3) | 1.384(11) |
| P(1)-O(2)  | 1.492(7) | N(1)-C(4) | 1.506(11) |
| P(1)-O(3)  | 1.522(6) | H-bonds   |           |
| P(2)-C(4)  | 1.879(9) | O(5)⋯N(1) | 2.62(2)   |
| P(2)-O(4)  | 1.610(7) | O(1)⋯O(4) | 2.39(1)   |

  

| Angle           | Amplitude/° | Angle          | Amplitude/° |
|-----------------|-------------|----------------|-------------|
| O(1)-Zr(1)-O(1) | 86.9(3)     | O(1)-P(1)-O(2) | 118.0(5)    |
| O(1)-Zr(1)-O(1) | 86.9(3)     | O(1)-P(1)-O(3) | 109.5(4)    |
| O(1)-Zr(1)-O(6) | 88.4(3)     | O(2)-P(1)-O(3) | 108.5(5)    |
| O(1)-Zr(1)-O(6) | 93.6(3)     | C(4)-P(2)-O(4) | 109.2(5)    |
| O(6)-Zr(1)-O(6) | 91.3(3)     | C(4)-P(2)-O(5) | 106.1(5)    |
| O(3)-Zr(2)-O(3) | 90.6(3)     | C(4)-P(2)-O(6) | 109.1(5)    |
| O(3)-Zr(2)-O(3) | 90.6(2)     | O(4)-P(2)-O(5) | 114.5(4)    |
| O(3)-Zr(2)-O(3) | 89.4(2)     | C(2)-N(1)-C(3) | 116(1)      |
| O(3)-Zr(2)-O(3) | 89.4(2)     | C(2)-N(1)-C(4) | 113.3(9)    |
| C(3)-P(1)-O(1)  | 102.4(5)    | C(3)-N(1)-C(4) | 109.5(9)    |
| C(3)-P(1)-O(2)  | 108.6(5)    | C(1)-C(2)-N(1) | 111(1)      |
| C(3)-P(1)-O(3)  | 109.5(5)    |                |             |

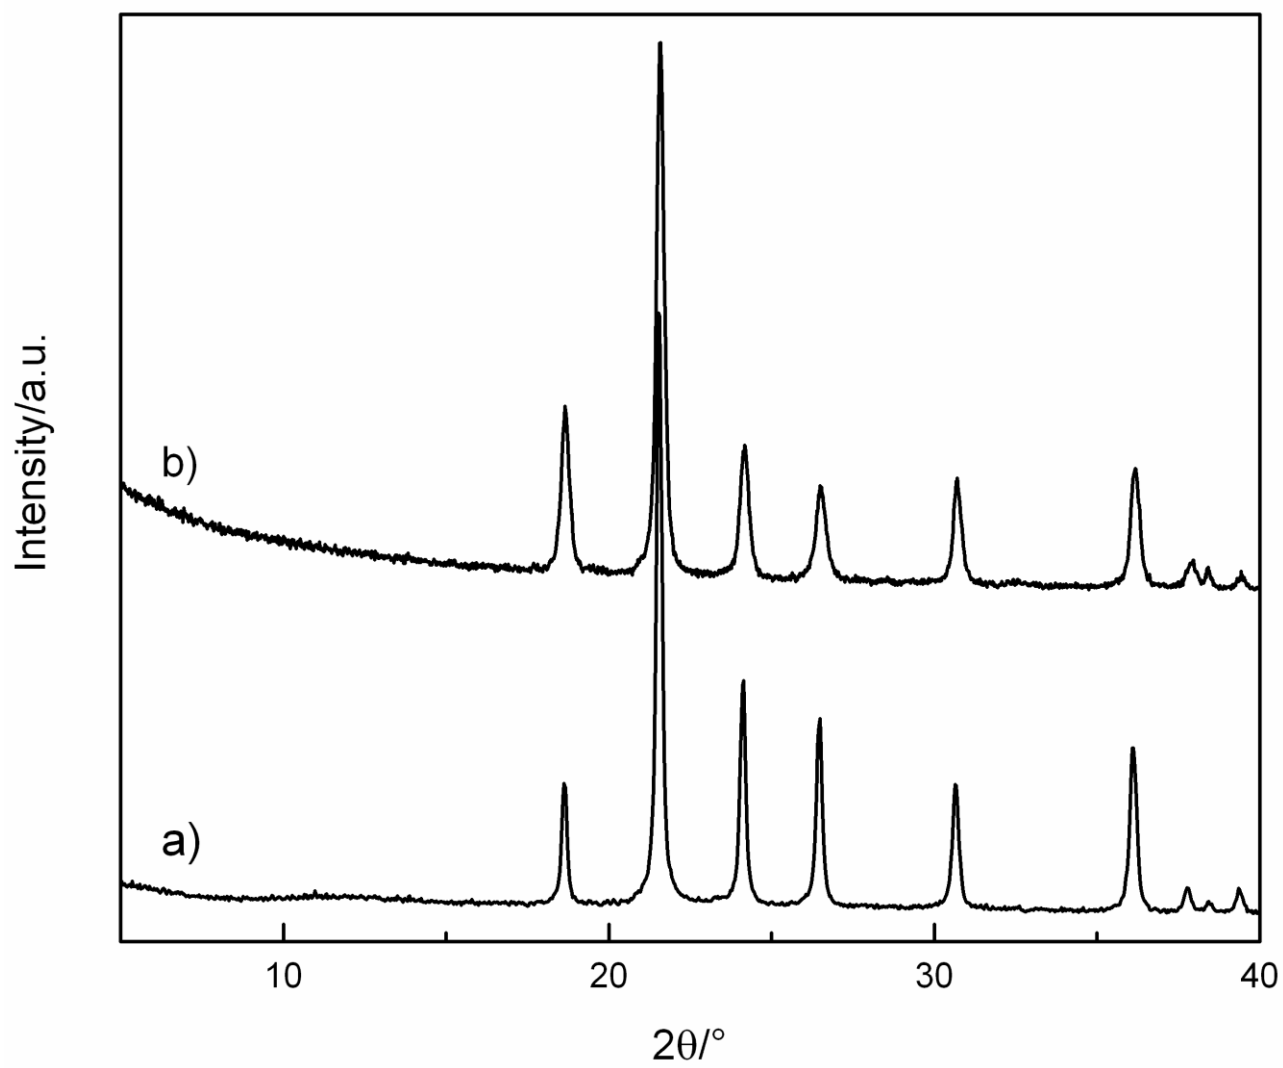

Figure 1S. XRPD patterns (Zr Pyrophosphate) of the TGA residues for **1** (a) and **2** (b).
